# Supplementary material
Source: Springer Nature journal article supplement (https://www.springermedizin.de/resource/supplementary/12960_2009_205_MOESM4_ESM.pdf/9570652)
Supplement: MOESM4 [file 9570652]

2616 Articles or abstracts identified initially through title, abstract and/or keyword screening

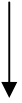

89 Articles identified, including those found from hand-searching references of selected studies and reviews, and those known to the authors

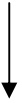

60 Articles retrieved

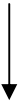

13 Excluded based on their abstract or language

6 Excluded as they were monographs or technical reports

6 Could not be found or retrieved

4 Removed after abstract authors contacted: studies not ready for publication

17 Did not meet study inclusion criteria

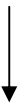

3 Full economic evaluations + 11 Costing studies
